# Supplementary material
Source: PubMed Central journal article supplement (PMC9194618)
Supplement: djac044_supplementary_data.pdf [file djac044_supplementary_data.pdf]

## SUPPLEMENTARY MATERIALS

**Supplementary Table 1. National Health Interview Survey measures of medical financial hardship consistently collected 1997-2014**

|                    | Measures                                | Universe                        | Question                                                                                                                                                                                                         |
|--------------------|-----------------------------------------|---------------------------------|------------------------------------------------------------------------------------------------------------------------------------------------------------------------------------------------------------------|
| Financial hardship | Delayed medical care                    | All persons                     | DURING THE PAST 12 MONTHS, has medical care been delayed for {person} because of worry about the cost? (Do not include dental care)<br>Response category: Yes or No                                              |
|                    | Forgone medical care                    |                                 | DURING THE PAST 12 MONTHS, was there any time when {person} needed medical care, but did not get it because {person} couldn't afford it?<br>Response category: Yes or No                                         |
|                    | Unable to afford prescription medicines | Sample adults 18 years or older | DURING THE PAST 12 MONTHS, was there any time when you needed any of the following, but didn't get it because you couldn't afford it? .....<br>Prescription medicines<br>Response category: Yes or No            |
|                    | Unable to afford mental health care     |                                 | DURING THE PAST 12 MONTHS, was there any time when you needed any of the following, but didn't get it because you couldn't afford it? .....<br>Mental health care or counseling<br>Response category: Yes or No  |
|                    | Unable to afford dental care            |                                 | DURING THE PAST 12 MONTHS, was there any time when you needed any of the following, but didn't get it because you couldn't afford it? .....<br>Dental care (including check-ups)<br>Response category: Yes or No |

**Supplementary Table 2. Association of Financial Hardship with Mortality among Cancer Survivors (restricted to those diagnosed >5 years) with Sequential Adjustment for Health Insurance Coverage**

| Sample characteristics <sup>a</sup>                        | Adjusted Model    |                      | Adjusted Model + Health Insurance |                      |
|------------------------------------------------------------|-------------------|----------------------|-----------------------------------|----------------------|
|                                                            | HR (95% CI)       | P-value <sup>b</sup> | HR 95% CI                         | P-value <sup>b</sup> |
| Ages 18-64 years (n = 7,946)                               |                   |                      |                                   |                      |
| Financial hardship <sup>c</sup> within 12 months of survey |                   |                      |                                   |                      |
| Financial hardship                                         | 1.20 (1.01, 1.43) | 0.04                 | 1.13 (0.93, 1.37)                 | 0.23                 |
| No financial hardship                                      | Ref               |                      | Ref                               |                      |
| Health insurance coverage                                  | –                 | –                    |                                   |                      |
| Public only                                                | –                 | –                    | 1.67 (1.37, 2.04)                 | <.001                |
| Uninsured or missing                                       | –                 | –                    | 1.11 (0.84, 1.47)                 | 0.47                 |
| Any private                                                | –                 | –                    | Ref                               |                      |
| Time since diagnoses                                       |                   |                      |                                   |                      |
| >5 years and ≤10 years                                     | Ref               |                      | Ref                               |                      |
| ≥10 years                                                  | 1.18 (0.99, 1.40) | 0.06                 | 1.18 (0.99, 1.41)                 | 0.06                 |
| Selected cancer sites                                      |                   |                      |                                   |                      |
| Prostate                                                   | 0.49 (0.29, 0.83) | 0.007                | 0.49 (0.29, 0.84)                 | 0.009                |
| Colorectal                                                 | 1.06 (0.68, 1.67) | 0.79                 | 1.05 (0.67, 1.65)                 | 0.84                 |
| Others                                                     | 1.25 (1.00, 1.57) | 0.05                 | 1.24 (0.99, 1.55)                 | 0.06                 |
| Female breast                                              | Ref               |                      | Ref                               |                      |
| Number of cancers diagnosed                                |                   |                      |                                   |                      |
| ≥2 cancers                                                 | 1.78 (1.36, 2.32) | <.001                | 1.66 (1.27, 2.18)                 | <.001                |
| Only 1 cancer                                              | Ref               |                      | Ref                               |                      |
| Number of health conditions <sup>d</sup>                   |                   |                      |                                   |                      |
| 1 condition                                                | 1.02 (0.85, 1.23) | 0.81                 | 1.00 (0.83, 1.21)                 | 0.98                 |
| 2 conditions                                               | 1.33 (1.06, 1.68) | 0.01                 | 1.24 (0.98, 1.58)                 | 0.07                 |
| ≥3 conditions                                              | 1.80 (1.41, 2.28) | <.001                | 1.62 (1.27, 2.06)                 | <.001                |
| 0 conditions                                               | Ref               |                      | Ref                               |                      |
| Sex                                                        |                   |                      |                                   |                      |
| Female                                                     | 0.59 (0.49, 0.72) | <.001                | 0.60 (0.50, 0.73)                 | <.001                |
| Male                                                       | Ref               |                      | Ref                               |                      |
| Race and ethnicity                                         |                   |                      |                                   |                      |
| Asian and others <sup>e</sup>                              | 1.19 (0.74, 1.90) | 0.48                 | 1.12 (0.70, 1.79)                 | 0.63                 |
| Hispanic                                                   | 0.87 (0.62, 1.21) | 0.40                 | 0.81 (0.59, 1.13)                 | 0.22                 |
| Non-Hispanic Black                                         | 1.14 (0.89, 1.46) | 0.29                 | 1.07 (0.83, 1.38)                 | 0.60                 |
| Non-Hispanic White                                         | Ref               |                      | Ref                               |                      |
| Current marital status                                     |                   |                      |                                   |                      |
| Not married <sup>f</sup>                                   | 1.54 (1.32, 1.80) | <.001                | 1.42 (1.21, 1.66)                 | <.001                |
| Married                                                    | Ref               |                      | Ref                               |                      |
| Education                                                  |                   |                      |                                   |                      |

|                                                            |                   |       |      |                   |      |       |
|------------------------------------------------------------|-------------------|-------|------|-------------------|------|-------|
| Less than high school                                      | 1.55 (1.26, 1.92) | <.001 |      | 1.40 (1.12, 1.75) |      | 0.003 |
| High school graduate                                       | 1.32 (1.11, 1.58) | 0.002 |      | 1.28 (1.07, 1.53) |      | 0.007 |
| Some college or more                                       | Ref               |       |      | Ref               |      |       |
| Era                                                        |                   |       |      |                   |      |       |
| 1997-2000                                                  | Ref               |       |      | Ref               |      |       |
| 2001-2005                                                  | 0.92 (0.77, 1.09) | 0.32  |      | 0.90 (0.76, 1.08) |      | 0.26  |
| 2006-2009                                                  | 0.63 (0.49, 0.80) | <.001 |      | 0.61 (0.48, 0.78) |      | <.001 |
| 2010-2014                                                  | 0.47 (0.36, 0.61) | <.001 |      | 0.45 (0.35, 0.58) |      | <.001 |
| Region                                                     |                   |       |      |                   |      |       |
| Midwest                                                    | 0.96 (0.75, 1.24) | 0.77  |      | 0.96 (0.74, 1.23) |      | 0.72  |
| South                                                      | 1.07 (0.84, 1.36) | 0.58  |      | 1.05 (0.82, 1.33) |      | 0.70  |
| West                                                       | 0.92 (0.71, 1.19) | 0.50  |      | 0.87 (0.67, 1.14) |      | 0.31  |
| Northeast                                                  | Ref               |       |      | Ref               |      |       |
| Ages 65-79 years (n = 6,311)                               |                   |       |      |                   |      |       |
| Financial hardship <sup>c</sup> within 12 months of survey |                   |       |      |                   |      |       |
| Financial hardship                                         | 1.18 (0.99, 1.41) | 0.06  |      | 1.18 (0.99, 1.41) |      | 0.07  |
| No financial hardship                                      | Ref               |       |      | Ref               |      |       |
| Health insurance coverage                                  |                   |       |      |                   |      |       |
| Medicare Advantage/HMO                                     | –                 | –     |      | 0.96 (0.83, 1.11) |      | 0.55  |
| Medicare and other public                                  | –                 | –     |      | 0.89 (0.70, 1.14) |      | 0.36  |
| Medicare only/other                                        | –                 | –     |      | 1.09 (0.89, 1.33) |      | 0.43  |
| Medicare and private                                       | –                 | –     |      | Ref               |      |       |
| Time since diagnoses                                       |                   |       |      |                   |      |       |
| >5 years and ≤10 years                                     | Ref               |       |      | Ref               |      |       |
| ≥10 years                                                  | 1.06 (0.94, 1.20) | 0.32  |      | 1.06 (0.94, 1.19) |      | 0.34  |
| Selected cancer sites                                      |                   |       |      |                   |      |       |
| Prostate                                                   | 0.82 (0.65, 1.03) | 0.09  | 0.82 | 0.65              | 1.03 | 0.08  |
| Colorectal                                                 | 0.74 (0.58, 0.94) | 0.01  | 0.74 | 0.58              | 0.94 | 0.01  |
| Others                                                     | 1.26 (1.08, 1.46) | 0.004 | 1.25 | 1.07              | 1.46 | 0.004 |
| Female breast                                              | Ref               |       |      | Ref               |      |       |
| Number of cancers diagnosed                                |                   |       |      |                   |      |       |
| 2 or 3 cancers                                             | 1.22 (0.96, 1.55) | 0.11  | 1.22 | 0.96              | 1.55 | 0.11  |
| Only 1 cancer                                              | Ref               |       |      | Ref               |      |       |
| Number of health conditions <sup>d</sup>                   |                   |       |      |                   |      |       |
| 1 condition                                                | 1.12 (0.96, 1.32) | 0.15  |      | 1.12 (0.96, 1.32) |      | 0.16  |
| 2 conditions                                               | 1.45 (1.23, 1.71) | <.001 |      | 1.45 (1.22, 1.71) |      | <.001 |
| ≥3 conditions                                              | 2.05 (1.74, 2.41) | <.001 |      | 2.04 (1.73, 2.40) |      | <.001 |
| 0 conditions                                               | Ref               |       |      | Ref               |      |       |
| Sex                                                        |                   |       |      |                   |      |       |

|                               |                   |       |                   |       |
|-------------------------------|-------------------|-------|-------------------|-------|
| Female                        | 0.67 (0.58, 0.77) | <.001 | 0.67 (0.58, 0.77) | <.001 |
| Male                          | Ref               |       | Ref               |       |
| Race/ethnicity                |                   |       |                   |       |
| Asian and others <sup>e</sup> | 0.75 (0.47, 1.20) | 0.23  | 0.75 (0.47, 1.19) | 0.22  |
| Hispanic                      | 0.64 (0.45, 0.90) | 0.01  | 0.63 (0.44, 0.89) | 0.008 |
| Non-Hispanic Black            | 1.15 (0.95, 1.39) | 0.17  | 1.13 (0.93, 1.37) | 0.21  |
| Non-Hispanic White            | Ref               |       | Ref               |       |
| Current marital status        |                   |       |                   |       |
| Not married <sup>f</sup>      | 1.18 (1.05, 1.33) | 0.006 | 1.17 (1.04, 1.32) | 0.01  |
| Married                       | Ref               |       | Ref               |       |
| Education                     |                   |       |                   |       |
| Less than high school         | 1.23 (1.06, 1.42) | 0.007 | 1.22 (1.05, 1.41) | 0.01  |
| High school graduate          | 1.17 (1.02, 1.35) | 0.03  | 1.17 (1.02, 1.35) | 0.03  |
| Some college or more          | Ref               |       | Ref               |       |
| Survey Era (years)            |                   |       |                   |       |
| 1997-2000                     | Ref               |       | Ref               |       |
| 2001-2005                     | 0.99 (0.88, 1.11) | 0.82  | 0.98 (0.87, 1.10) | 0.71  |
| 2006-2009                     | 0.82 (0.68, 0.98) | 0.03  | 0.81 (0.68, 0.97) | 0.02  |
| 2010-2004                     | 0.61 (0.51, 0.74) | <.001 | 0.61 (0.50, 0.74) | <.001 |
| Region                        |                   |       |                   |       |
| Midwest                       | 0.99 (0.83, 1.19) | 0.94  | 0.99 (0.83, 1.19) | 0.94  |
| South                         | 1.01 (0.86, 1.18) | 0.92  | 1.00 (0.85, 1.17) | 0.99  |
| West                          | 0.91 (0.75, 1.09) | 0.30  | 0.91 (0.75, 1.10) | 0.32  |
| Northeast                     | Ref               |       | Ref               |       |

<sup>a</sup>Data from 1997-2014 National Health Interview Survey (NHIS) linked to NHIS Mortality Files with vital status through December 31, 2015. All models used age as the time scale and adjusted for financial hardship measure, time since diagnosis, major cancer site, multiple cancer status, number of health conditions, sex, race and ethnicity, marital status, educational attainment, survey year, and region. CI = confidence interval. HMO= health maintenance organization. Ref=reference category.

<sup>b</sup>Two-sided test of statistical significance of differences in hazards from multivariable Cox proportion hazards model

<sup>c</sup>Financial hardship in past 12 months measured as problems affording prescription medicine, mental health care/counseling, or dental care or delaying or forgoing any medical care due to cost (**Supplementary Table 1** lists exact wording of questions).

<sup>d</sup>Conditions included arthritis, asthma, cancer, diabetes, emphysema, heart disease (angina, coronary heart disease, heart attack, other heart condition/disease), high cholesterol, hypertension, and stroke.

<sup>e</sup>Other race and ethnicity includes Native American and Alaska Natives, multiple races, Hispanic Black, and unknown race and/or ethnicity.

<sup>f</sup>Not married includes widowed, divorced, separated, or never married.

**Supplementary Table 3 . Sensitivity Analysis for Robustness of Associations between Medical Financial Hardship and Mortality to Unmeasured Confounding**

| Cancer survivor group                                      | Adjusted Model                                    | Adjusted Model + Health Insurance                 |
|------------------------------------------------------------|---------------------------------------------------|---------------------------------------------------|
|                                                            | E-value <sup>a</sup><br>Point estimate (Upper CI) | E-value <sup>a</sup><br>Point estimate (Upper CI) |
| Age 18-64 years, all cancer survivors                      | 1.604 (1.258)                                     | 1.415 (1.000)                                     |
| Age 18-64 years, cancer survivors >5 years after diagnosis | 1.683 (1.078)                                     | 1.508 (1.000)                                     |
| Age 65-79 years, all cancer survivors                      | 1.547 (1.152)                                     | 1.566 (1.184)                                     |
| Age 65-79 years, cancer survivors >5 years after diagnosis | 1.648 (1.000)                                     | 1.647 (1.000)                                     |

<sup>a</sup>The E-value represents the minimum strength of association, that an unmeasured confounder would need to have with both the treatment and outcome to fully explain a specific treatment– outcome association, conditional on the measured covariates. In models where the upper confidence interval (CI) includes 1.0, unmeasured confounding could explain the observed associations.
